# Supplementary material
Source: publisher figshare collection journal article supplement (https://sage.figshare.com/ndownloader/files/13992590)
Supplement: Supplementary file 1 [file 13992590]

**Online Appendix**

| **Online Appendix A.** Sample between 1980-1999 | | | | | |
| --- | --- | --- | --- | --- | --- |
| Colonial History | 2.648** | 2.174** | 2.213** | 1.932** | 1.456** |
|  | (0.310) | (0.317) | (0.311) | (0.320) | (0.334) |
| Policy Similarity |  | 0.851** |  |  | 0.533** |
|  |  | (0.110) |  |  | (0.121) |
| Shared Language |  |  | 1.423** |  | 0.876** |
|  |  |  | (0.239) |  | (0.274) |
| Bilateral Trade (log) |  |  |  | 0.426** | 0.337** |
|  |  |  |  | (0.056) | (0.066) |
| Power Balance | -1.227** | -1.057** | -1.219** | -1.086** | -0.994** |
|  | (0.075) | (0.082) | (0.076) | (0.078) | (0.084) |
| Physical Distance (log) | -1.282** | -1.460** | -1.062** | -1.176** | -1.286** |
|  | (0.174) | (0.199) | (0.174) | (0.179) | (0.206) |
| Oil Exporter | 0.971** | 0.636 | 1.130** | 0.713 | 0.549 |
|  | (0.456) | (0.434) | (0.437) | (0.437) | (0.424) |
| Level of Democratization | 0.008 | 0.020 | -0.001 | -0.021 | -0.013 |
|  | (0.034) | (0.032) | (0.033) | (0.032) | (0.031) |
| Real income/capita | 0.728** | 0.385 | 0.690** | 0.073 | -0.110 |
|  | (0.283) | (0.275) | (0.279) | (0.278) | (0.285) |
| Ethnic War | -1.086** | -0.830** | -0.969** | -0.988** | -0.695** |
|  | (0.378) | (0.356) | (0.365) | (0.353) | (0.347) |
| War intensity | 0.001 | 0.000 | 0.001 | 0.001 | 0.000 |
|  | (0.000) | (0.000) | (0.000) | (0.000) | (0.000) |
| Refugee Crisis | 0.483 | 0.437 | 0.843** | 0.634 | 0.825** |
|  | (0.385) | (0.365) | (0.380) | (0.363) | (0.363) |
| Constant | 1.564** | 1.312** | 1.423** | 1.540** | 1.257** |
|  | (0.269) | (0.302) | (0.272) | (0.260) | (0.297) |
| N | 116801 | 105099 | 110445 | 97624 | 82088 |
| BIC |  |  |  |  |  |
| Chi2>p | 0.000 | 0.000 | 0.000 | 0.000 | 0.000 |
| ** *p*=.05 |  |  |  |  |  |
|  | | | |  |  |

| **Online Appendix B**. Sample between 1980-2000, conditional models | | |  |
| --- | --- | --- | --- |
| Colonial History | 4.227** | 2.081** | 2.025** |
|  | (0.906) | (0.891) | (0.437) |
| Bilateral Trade × Colonial History | -0.600** |  |  |
|  | (0.195) |  |  |
| Policy Similarity × Colonial History |  | -0.303 |  |
|  |  | (0.408) |  |
| Shared Language × Colonial History |  |  | -1.189* |
|  |  |  | (0.654) |
| Bilateral Trade (log) | 0.372** | 0.336** | 0.332** |
|  | (0.066) | (0.066) | (0.065) |
| Policy Similarity | 0.528** | 0.550** | 0.525** |
|  | (0.121) | (0.124) | (0.121) |
| Shared Language | 0.964** | 0.900** | 1.074** |
|  | (0.270) | (0.275) | (0.288) |
| Power Balance | -0.973** | -0.984** | -0.979** |
|  | (0.085) | (0.085) | (0.084) |
| Physical Distance (log) | -1.300** | -1.277** | -1.236** |
|  | (0.204) | (0.206) | (0.207) |
| Oil Exporter | 0.640 | 0.559 | 0.625 |
|  | (0.417) | (0.423) | (0.422) |
| Level of Democratization | -0.022 | -0.012 | -0.016 |
|  | (0.030) | (0.031) | (0.031) |
| Real income/capita | -0.118 | -0.122 | -0.105 |
|  | (0.279) | (0.285) | (0.284) |
| Ethnic War | -0.581 | -0.668 | -0.627 |
|  | (0.341) | (0.348) | (0.346) |
| War intensity | 0.000 | 0.000 | 0.000 |
|  | (0.000) | (0.000) | (0.000) |
| Refugee Crisis | 0.771** | 0.808** | 0.751** |
|  | (0.354) | (0.363) | (0.361) |
| Constant | 1.184** | 1.248** | 1.227** |
|  | (0.299) | (0.298) | (0.298) |
| *N* (*n*) ♮ | 82088(647) | 82088(647) | 82088(647) |
| BIC |  |  |  |
| Chi2>p | 0.000 | 0.000 | 0.000 |
| ** *p*=.05 |  |  |  |
| ♮ *N –* total number of civil war – potential intervener dyads (level 1), *n* – number of conflict-years (level 2), * p=.069 | | | |

| **Online Appendix C.** Only former colonies experiencing civil wars | | | | | |
| --- | --- | --- | --- | --- | --- |
| Colonial History | 2.603** | 2.249** | 2.093** | 2.058** | 1.565** |
|  | (0.438) | (0.441) | (0.445) | (0.449) | (0.474) |
| Policy Similarity |  | 0.941** |  |  | 0.688** |
|  |  | (0.174) |  |  | (0.178) |
| Shared Language |  |  | 1.303** |  | 0.811** |
|  |  |  | (0.342) |  | (0.381) |
| Bilateral Trade (log) |  |  |  | 0.331** | 0.223** |
|  |  |  |  | (0.076) | (0.085) |
| Power Balance | -1.074** | -0.855** | -1.075** | -0.935** | -0.796** |
|  | (0.103) | (0.110) | (0.099) | (0.106) | (0.111) |
| Physical Distance (log) | -1.381** | -1.831** | -1.191** | -1.327** | -1.692** |
|  | (0.242) | (0.283) | (0.235) | (0.243) | (0.285) |
| Oil Exporter | 1.892** | 1.474** | 1.897** | 1.756** | 1.518** |
|  | (0.633) | (0.644) | (0.563) | (0.613) | (0.604) |
| Level of Democratization | 0.129** | 0.148** | 0.113** | 0.095 | 0.116** |
|  | (0.053) | (0.052) | (0.048) | (0.050) | (0.049) |
| Real income/capita | 1.200** | 0.751 | 1.173** | 0.736 | 0.379 |
|  | (0.444) | (0.458) | (0.404) | (0.436) | (0.451) |
| Ethnic War | -1.025** | -0.501 | -0.755 | -0.722 | -0.154 |
|  | (0.495) | (0.481) | (0.455) | (0.474) | (0.471) |
| War intensity | 0.001** | 0.001** | 0.001** | 0.001** | 0.001** |
|  | (0.000) | (0.000) | (0.000) | (0.000) | (0.000) |
| Refugee Crisis | 0.673 | 0.508 | 0.946 | 0.784 | 0.785 |
|  | (0.530) | (0.540) | (0.491) | (0.514) | (0.519) |
| Constant | 1.441** | 1.462** | 1.091** | 1.472** | 1.316** |
|  | (0.432) | (0.411) | (0.480) | (0.392) | (0.438) |
| N | 61204 | 53386 | 57583 | 50255 | 40846 |
| BIC |  |  |  |  |  |
| Chi2>p | 0.000 | 0.000 | 0.000 | 0.000 | 0.000 |
| ** *p*=.05 | | | |  |  |

| **Online Appendix D.** Only former colonies experiencing civil wars, conditional models | | | |
| --- | --- | --- | --- |
| Colonial History | 4.294** | 3.062** | 2.165** |
|  | (1.023) | (1.057) | (0.603) |
| Bilateral Trade × Colonial History | -0.578** |  |  |
|  | (0.207) |  |  |
| Policy Similarity × Colonial History |  | -0.737 |  |
|  |  | (0.492) |  |
| Shared Language × Colonial History |  |  | -1.259 |
|  |  |  | (0.894) |
| Bilateral Trade (log) | 0.273** | 0.233** | 0.228** |
|  | (0.085) | (0.084) | (0.084) |
| Policy Similarity | 0.684** | 0.740** | 0.673** |
|  | (0.178) | (0.182) | (0.176) |
| Shared Language | 0.995** | 0.863** | 1.042** |
|  | (0.375) | (0.382) | (0.404) |
| Power Balance | -0.744** | -0.762** | -0.784** |
|  | (0.111) | (0.112) | (0.110) |
| Physical Distance (log) | -1.634** | -1.658** | -1.633** |
|  | (0.280) | (0.286) | (0.285) |
| Oil Exporter | 1.611** | 1.536** | 1.593** |
|  | (0.571) | (0.595) | (0.593) |
| Level of Democratization | 0.097** | 0.112** | 0.107** |
|  | (0.047) | (0.049) | (0.049) |
| Real income/capita | 0.390 | 0.312 | 0.368 |
|  | (0.429) | (0.446) | (0.443) |
| Ethnic War | -0.012 | -0.075 | -0.075 |
|  | (0.455) | (0.469) | (0.468) |
| War intensity | 0.001** | 0.001** | 0.001** |
|  | (0.000) | (0.000) | (0.000) |
| Refugee Crisis | 0.752 | 0.748 | 0.712 |
|  | (0.491) | (0.513) | (0.512) |
| Constant | 1.108** | 1.262** | 1.244** |
|  | (0.460) | (0.445) | (0.451) |
| N | 40846 | 40846 | 40846 |
| BIC |  |  |  |
| Chi2>p | 0.000 | 0.000 | 0.000 |
| ** *p*=.05 | | | |

| **Online Appendix E**. Substituting Total Dyadic Trade for Dyadic Trade Dependence | | | | | | | |
| --- | --- | --- | --- | --- | --- | --- | --- |
| Colonial History | 2.640** | 1.984** | 2.654** | | 3.115** | | 2.491** | |
|  | (0.450) | (0.461) | (0.538) | | (1.033) | | (0.601) | |
| Bilateral Trade × Colonial History |  |  | -1.90e+06 | |  | |  | |
|  |  |  | (1.44e+06) | | | |  | |
| Policy Similarity × Colonial History |  |  |  | | -0.561 | |  | |
|  |  |  |  | | (0.479) | |  | |
| Shared Language × Colonial History |  |  |  | |  | | -1.071 | |
|  |  |  |  | |  | | (0.901) | |
| Bilateral Trade (log) | -8.18e+04 | -1.74e+05 | -6.26e+04 | | -1.48e+05 | | -1.39e+05 | |
|  | (1.13e+05) | (1.94e+05) | (1.14e+05) | | (1.83e+05) | | (1.80e+05) | |
| Policy Similarity |  | 0.835** | 0.837** | | 0.878** | | 0.824** | |
|  |  | (0.169) | (0.167) | | (0.173) | | (0.167) | |
| Shared Language |  | 1.005** | 1.147** | | 1.036** | | 1.190** | |
|  |  | (0.369) | (0.363) | | (0.370) | | (0.392) | |
| Power Balance | -1.077** | -0.853** | -0.844** | | -0.832** | | -0.845** | |
|  | (0.101) | (0.110) | (0.109) | | (0.111) | | (0.110) | |
| Physical Distance (log) | -1.583** | -1.712** | -1.700** | | -1.673** | | -1.652** | |
|  | (0.244) | (0.283) | (0.277) | | (0.285) | | (0.285) | |
| Oil Exporter | 2.048** | 1.740** | 1.918** | | 1.749** | | 1.800** | |
|  | (0.670) | (0.599) | (0.589) | | (0.591) | | (0.592) | |
| Level of Democratization | 0.110** | 0.123** | 0.110** | | 0.120** | | 0.117** | |
|  | (0.055) | (0.051) | (0.049) | | (0.050) | | (0.050) | |
| Real income/capita | 0.762 | 0.469 | 0.508 | | 0.425 | | 0.458 | |
|  | (0.423) | (0.401) | (0.387) | | (0.398) | | (0.395) | |
| Ethnic War | -1.233** | -0.495 | -0.461 | | -0.452 | | -0.445 | |
|  | (0.520) | (0.467) | (0.456) | | (0.463) | | (0.464) | |
| War intensity | 0.001** | 0.001** | 0.001** | | 0.001** | | 0.001** | |
|  | (0.000) | (0.000) | (0.000) | | (0.000) | | (0.000) | |
| Refugee Crisis | 0.449 | 0.454 | 0.388 | | 0.434 | | 0.397 | |
|  | (0.534) | (0.502) | (0.488) | | (0.497) | | (0.498) | |
| Constant | 1.674** | 1.259** | 1.128** | | 1.208** | | 1.202** | |
|  | (0.398) | (0.471) | (0.486) | | (0.479) | | (0.482) | |
| N | 58379 | 47919 | 47919 | | 47919 | | 47919 | |
| BIC |  |  |  | |  | |  | |
| Chi2>p | 0.000 | 0.000 | 0.000 | | 0.000 | | 0.000 | |
| ** *p*=.05 | | | |  | |  | |

| **Online Appendix F:** Adding the effect of major power | | | |
| --- | --- | --- | --- |
|  | (1) | (2) | (3) |
| any type of intervention |  |  |  |
| Major Power (dummy) | 2.111** | 2.074** | 1.980** |
|  | (0.519) | (0.520) | (0.523) |
| Colonial History | 4.508** | 3.486** | 1.814** |
|  | (1.139) | (1.165) | (0.650) |
| Bilateral Trade × Colonial History | -0.704** |  |  |
|  | (0.228) |  |  |
| Policy Similarity × Colonial History |  | -1.104** |  |
|  |  | (0.521) |  |
| Shared Language × Colonial History |  |  | -1.459 |
|  |  |  | (0.947) |
| Bilateral Trade (log) | 0.173 | 0.126 | 0.126 |
|  | (0.091) | (0.091) | (0.091) |
| Policy Similarity | 0.524** | 0.615** | 0.529** |
|  | (0.185) | (0.188) | (0.184) |
| Shared Language | 1.194** | 1.018** | 1.196** |
|  | (0.377) | (0.382) | (0.401) |
| Power Balance | -0.504** | -0.506** | -0.556** |
|  | (0.121) | (0.124) | (0.121) |
| Physical Distance (log) | -1.766** | -1.760** | -1.752** |
|  | (0.296) | (0.300) | (0.296) |
| Oil Exporter | 1.906** | 1.770** | 1.814** |
|  | (0.596) | (0.612) | (0.607) |
| Level of Democratization | 0.089 | 0.105** | 0.096 |
|  | (0.048) | (0.049) | (0.049) |
| Real income/capita | -0.247 | -0.296 | -0.214 |
|  | (0.401) | (0.413) | (0.410) |
| Ethnic War | -0.104 | -0.165 | -0.204 |
|  | (0.466) | (0.475) | (0.473) |
| War intensity | 0.001** | 0.001** | 0.001** |
|  | (0.000) | (0.000) | (0.000) |
| Refugee Crisis | 0.358 | 0.349 | 0.337 |
|  | (0.489) | (0.506) | (0.504) |
| Constant | 1.263** | 1.371** | 1.340** |
|  | (0.439) | (0.429) | (0.436) |
| N | 48168 | 48168 | 48168 |
| ** p<0.05 |  |  |  |

| **Online Appendix G**. Substituting Policy Similarity for Military Alliance | | | |
| --- | --- | --- | --- |
| Colonial History | 4.242** | 2.186** | 2.410** |
|  | (1.083) | (0.497) | (0.629) |
| Bilateral Trade × Colonial History | -0.487** |  |  |
|  | (0.223) |  |  |
| Policy Similarity × Colonial History |  | -28.114 |  |
|  |  | (6.61e+05) |  |
| Shared Language × Colonial History |  |  | -0.843 |
|  |  |  | (0.928) |
| Bilateral Trade (log) | 0.290** | 0.250** | 0.256** |
|  | (0.077) | (0.077) | (0.077) |
| Policy Similarity | 0.840 | 1.141** | 0.847 |
|  | (0.493) | (0.508) | (0.507) |
| Shared Language | 0.866** | 0.623 | 0.880** |
|  | (0.381) | (0.389) | (0.411) |
| Power Balance | -0.924** | -0.959** | -0.943** |
|  | (0.103) | (0.104) | (0.104) |
| Physical Distance (log) | -1.247** | -1.260** | -1.245** |
|  | (0.245) | (0.248) | (0.247) |
| Oil Exporter | 2.207** | 2.116** | 2.177** |
|  | (0.603) | (0.615) | (0.621) |
| Level of Democratization | 0.049 | 0.057 | 0.061 |
|  | (0.050) | (0.051) | (0.051) |
| Real income/capita | 0.131 | 0.101 | 0.137 |
|  | (0.398) | (0.408) | (0.410) |
| Ethnic War | -0.581 | -0.687 | -0.620 |
|  | (0.481) | (0.488) | (0.493) |
| War intensity | 0.001** | 0.001** | 0.001** |
|  | (0.000) | (0.000) | (0.000) |
| Refugee Crisis | 0.567 | 0.652 | 0.560 |
|  | (0.489) | (0.503) | (0.506) |
| Constant | 1.413** | 1.496** | 1.505** |
|  | (0.424) | (0.423) | (0.422) |
| N | 54887 | 54887 | 54887 |
| BIC |  |  |  |
| Chi2>p | 0.000 | 0.000 | 0.000 |
| ** *p*=.05 | | | |

| **Online Appendix H**. Sample only with countries that have a history of intervention | | | |
| --- | --- | --- | --- |
|  | (1) | (2) | (3)` |
| Colonial History | 4.186** | 3.271** | 1.988** |
|  | (1.046) | (1.087) | (0.617) |
| Bilateral Trade × Colonial History | -0.576** |  |  |
|  | (0.210) |  |  |
| Policy Similarity × Colonial History |  | -0.858* |  |
|  |  | (0.486) |  |
| Shared Language × Colonial History |  |  | -1.116 |
|  |  |  | (0.905) |
| Bilateral Trade (log) | 0.247** | 0.211** | 0.209** |
|  | (0.082) | (0.081) | (0.082) |
| Policy Similarity | 0.649** | 0.704** | 0.638** |
|  | (0.168) | (0.172) | (0.168) |
| Shared Language | 0.848** | 0.738** | 0.874** |
|  | (0.365) | (0.372) | (0.392) |
| Power Balance | -0.631** | -0.629** | -0.663** |
|  | (0.109) | (0.112) | (0.110) |
| Physical Distance (log) | -1.561** | -1.534** | -1.555** |
|  | (0.270) | (0.276) | (0.271) |
| Oil Exporter | 1.838** | 1.728** | 1.768** |
|  | (0.565) | (0.585) | (0.585) |
| Level of Democratization | 0.079 | 0.094** | 0.089 |
|  | (0.046) | (0.048) | (0.048) |
| Real income/capita | -0.099 | -0.159 | -0.104 |
|  | (0.382) | (0.395) | (0.393) |
| Ethnic War | -0.253 | -0.298 | -0.293 |
|  | (0.450) | (0.460) | (0.462) |
| War intensity | 0.001** | 0.001** | 0.001** |
|  | (0.000) | (0.000) | (0.000) |
| Refugee Crisis | 0.385 | 0.406 | 0.388 |
|  | (0.467) | (0.484) | (0.484) |
| Constant | 1.141** | 1.272** | 1.264** |
|  | (0.440) | (0.429) | (0.433) |
| N | 17419 | 17419 | 17419 |
| Chi^2>p | 0.000 | 0.000 | 0.000 |
| ** p<0.05, * *p*= 0.078 |  |  |  |

| **Online Appendix I.** Desegregating Dyadic Trade into Intervener’s Imports and Exports | | | | | | | | |
| --- | --- | --- | --- | --- | --- | --- | --- | --- |
|  | **1** | **2** | **3** | **4** | **5** | **6** | **7** | **8** |
| Colonial History | 1.317*** | 1.717*** | 4.001*** | 3.787*** | 2.104** | 2.209*** | 2.252*** | 2.432*** |
|  | (0.342) | (0.326) | (0.883) | (0.612) | (0.905) | (0.620) | (0.856) | (0.605) |
| **Bilateral Imports** | **0.386***** |  | **0.428***** |  | **0.387***** | **0.261***** |  |  |
|  | **(0.0707)** |  | **(0.0716)** |  | **(0.0704)** | **(0.0924)** |  |  |
| **Bilateral Exports** |  | **0.198***** |  | **0.250***** |  |  | **0.197***** | **0.104** |
|  |  | **(0.0597)** |  | **(0.0608)** |  |  | **(0.0595)** | **(0.0820)** |
| Policy Similarity | 0.553*** | 0.610*** | 0.552*** | 0.586*** | 0.573*** | 0.703*** | 0.626*** | 0.753*** |
|  | (0.119) | (0.121) | (0.119) | (0.122) | (0.121) | (0.175) | (0.124) | (0.175) |
| Shared Language | 0.863*** | 0.920*** | 0.939*** | 1.040*** | 0.892*** | 1.109*** | 0.939*** | 1.137*** |
|  | (0.275) | (0.271) | (0.272) | (0.267) | (0.277) | (0.391) | (0.271) | (0.392) |
| **Colonial History X Imports** |  |  | **-0.628***** |  |  |  |  |  |
|  |  |  | **(0.204)** |  |  |  |  |  |
| **Colonial History X Exports** |  |  |  | **-0.681***** |  |  |  |  |
|  |  |  |  | **(0.195)** |  |  |  |  |
| Colonial History X Policy Similarity |  |  |  |  | -0.380 |  | -0.261 |  |
|  |  |  |  |  | (0.414) |  | (0.392) |  |
| Colonial History X Shared Language |  |  |  |  |  | -1.452 |  | -1.241 |
|  |  |  |  |  |  | (0.911) |  | (0.892) |
| Power Balance | -1.002*** | -1.015*** | -0.983*** | -0.986*** | -0.990*** | -0.798*** | -1.006*** | -0.838*** |
|  | (0.0851) | (0.0825) | (0.0855) | (0.0833) | (0.0860) | (0.111) | (0.0836) | (0.109) |
| Proximity | -1.280*** | -1.258*** | -1.304*** | -1.254*** | -1.270*** | -1.635*** | -1.250*** | -1.612*** |
|  | (0.209) | (0.201) | (0.208) | (0.198) | (0.209) | (0.282) | (0.201) | (0.279) |
| Oil Exporter | 0.644 | 0.632 | 0.772* | 0.722* | 0.658 | 1.895*** | 0.640 | 1.827*** |
|  | (0.425) | (0.413) | (0.419) | (0.411) | (0.425) | (0.607) | (0.412) | (0.593) |
| Level of Democratization | -0.0105 | -0.00728 | -0.0195 | -0.0165 | -0.0101 | 0.0942* | -0.00726 | 0.105** |
|  | (0.0308) | (0.0302) | (0.0306) | (0.0303) | (0.0307) | (0.0498) | (0.0301) | (0.0502) |
| GDP/Capita | -0.196 | 0.134 | -0.224 | 0.0879 | -0.215 | -0.0991 | 0.122 | 0.184 |
|  | (0.290) | (0.275) | (0.286) | (0.271) | (0.290) | (0.414) | (0.275) | (0.401) |
| Ethnic War | -0.693** | -0.697** | -0.600* | -0.568* | -0.660* | -0.228 | -0.674** | -0.348 |
|  | (0.349) | (0.342) | (0.344) | (0.338) | (0.350) | (0.476) | (0.342) | (0.471) |
| Intensity | 0.000292 | 0.000284 | 0.000306 | 0.000282 | 0.000320 | 0.00109** | 0.000301 | 0.00108** |
|  | (0.000317) | (0.000306) | (0.000312) | (0.000303) | (0.000318) | (0.000449) | (0.000306) | (0.000443) |
| Refugees | 0.811** | 0.821** | 0.752** | 0.767** | 0.788** | 0.440 | 0.808** | 0.419 |
|  | (0.365) | (0.357) | (0.357) | (0.351) | (0.365) | (0.499) | (0.356) | (0.495) |
| Constant | -0.321 | -2.288 | -0.0249 | -2.043 | -0.265 | 1.659 | -2.271 | -0.131 |
|  | (2.924) | (2.834) | (2.875) | (2.779) | (2.918) | (3.991) | (2.827) | (3.923) |
|  |  |  |  |  |  |  |  |  |
| Observations | 82,088 | 82,088 | 82,088 | 82,088 | 82,088 | 48,168 | 82,088 | 48,168 |
| Number of conflict-years | 647 | 647 | 647 | 647 | 647 | 363 | 647 | 363 |

| **Online Appendix J.** Main Models including dummy for France | | |
| --- | --- | --- |
|  | 1980-2000 | 1989-2000 |
| France | 0.780** | 1.544** |
|  | (0.360) | (0.464) |
| Bilateral Trade (log) | 0.363** | 0.224** |
|  | (0.067) | (0.086) |
| Colonial History | 4.251** | 4.596** |
|  | (0.897) | (1.069) |
| Bilateral Trade × Colonial History | -0.653** | -0.747** |
|  | (0.194) | (0.226) |
| Policy Similarity | 0.511** | 0.699** |
|  | (0.123) | (0.182) |
| Shared Language | 0.992** | 1.105** |
|  | (0.271) | (0.370) |
| Power Balance | -0.978** | -0.766** |
|  | (0.086) | (0.114) |
| Physical Distance (log) | -1.281** | -1.628** |
|  | (0.206) | (0.283) |
| Oil Exporter | 0.647 | 1.890** |
|  | (0.418) | (0.587) |
| Level of Democratization | -0.021 | 0.091 |
|  | (0.030) | (0.049) |
| Real income/capita | -0.105 | 0.006 |
|  | (0.280) | (0.398) |
| Ethnic War | -0.615 | -0.293 |
|  | (0.343) | (0.468) |
| War intensity | 0.000 | 0.001** |
|  | (0.000) | (0.000) |
| Refugee Crisis | 0.744** | 0.416 |
|  | (0.355) | (0.484) |
| Constant | 1.188** | 1.207** |
|  | (0.298) | (0.449) |
| N (civil war year) | 82088 (647) | 48168 (363) |
| Rho | .50 | .50 |
| ** p<0.05 | | |

| **Online Appendix K.** Testing trade effects with 2 and 3-year lag | | |
| --- | --- | --- |
|  | **Trade lagged by two years** | **Trade lagged by three years** |
| Bilateral Trade (log) | 0.284** | 0.374** |
|  | (0.076) | (0.081) |
| Colonial History | 4.601** | 6.094** |
|  | (1.142) | (1.219) |
| Bilateral Trade × Colonial History | -0.619** | -0.989** |
|  | (0.245) | (0.276) |
| Policy Similarity | 0.807** | 0.775** |
|  | (0.149) | (0.155) |
| Shared Language | 1.026** | 1.004** |
|  | (0.307) | (0.309) |
| Power Balance | -1.086** | -1.053** |
|  | (0.112) | (0.111) |
| Physical Distance (log) | -1.399** | -1.451** |
|  | (0.249) | (0.257) |
| Oil Exporter | 0.525 | 0.444 |
|  | (0.483) | (0.477) |
| Level of Democratization | -0.015 | -0.013 |
|  | (0.033) | (0.032) |
| Real income/capita | 0.129 | -0.049 |
|  | (0.306) | (0.302) |
| Ethnic War | -0.465 | -0.345 |
|  | (0.380) | (0.374) |
| War intensity | 0.000 | 0.000 |
|  | (0.000) | (0.000) |
| Refugee Crisis | 0.875** | 0.853** |
|  | (0.398) | (0.388) |
| Constant | 1.277** | 1.168** |
|  | (0.335) | (0.350) |
| Rho | .52 | .49 |
| N (n conflict years) | 64701 | 63338 |
| ** p<0.05 | | |

| **Online Appendix L.** Excluding the Refugees and War Casualties Variables | | | |
| --- | --- | --- | --- |
|  | Civil Wars 1989-2000 | | |
| Colonial History | 4.300** | 3.129** | 2.450** |
|  | (1.050) | (1.104) | (0.615) |
| Bilateral Trade × Colonial History | -0.567** |  |  |
|  | (0.212) |  |  |
| Policy Similarity × Colonial History |  | -0.748 |  |
|  |  | (0.521) |  |
| Shared Language × Colonial History |  |  | -1.615* |
|  |  |  | (0.890) |
| Bilateral Trade (log) | 0.233** | 0.196** | 0.195** |
|  | (0.084) | (0.083) | (0.083) |
| Policy Similarity | 0.798** | 0.850** | 0.782** |
|  | (0.184) | (0.188) | (0.180) |
| Shared Language | 0.921** | 0.812** | 1.031** |
|  | (0.366) | (0.374) | (0.390) |
| Power Balance | -0.733** | -0.744** | -0.762** |
|  | (0.110) | (0.112) | (0.109) |
| Physical Distance (log) | -1.668** | -1.677** | -1.638** |
|  | (0.276) | (0.281) | (0.279) |
| Oil Exporter | 1.513** | 1.407** | 1.502** |
|  | (0.583) | (0.602) | (0.598) |
| Level of Democratization | 0.047 | 0.057 | 0.055 |
|  | (0.045) | (0.046) | (0.046) |
| Real income/capita | -0.143 | -0.210 | -0.129 |
|  | (0.400) | (0.413) | (0.410) |
| Ethnic War | -0.465 | -0.541 | -0.497 |
|  | (0.467) | (0.477) | (0.476) |
| Constant | 1.382** | 1.490** | 1.454** |
|  | (0.414) | (0.408) | (0.415) |
| Rho | .55 | .57 | .57 |
| N (civil war year) | 48168 | 48168 | 48168 |
| ** p<0.05, * *p*= 0.070 | | | |
